# Supplementary material for: Characterization and Evaluation of the Artemis Camera for Fluorescence-Guided Cancer Surgery
Source: PubMed Central journal article supplement (PMC4422838; doi:10.1007/s11307-014-0799-z), 2014-10-25
Supplement: 11307_2014_799_MOESM1_ESM.pdf [file 11307_2014_799_MOESM1_ESM.pdf]

## Supplemental Information

### Characterization and Evaluation of the Artemis Camera for fluorescence-guided Cancer Surgery

#### Molecular Imaging and Biology

P.B.A.A. van Driel<sup>1\*</sup>, M. van de Giessen<sup>2\*</sup>, M.C. Boonstra<sup>3</sup>, T.J.A. Snoeks<sup>1</sup>, S. Keerweer<sup>4</sup>, S. Oliveira<sup>5,6</sup>, C.J.H. van de Velde<sup>3</sup>, B.P.F. Lelieveldt<sup>2</sup>, A.L. Vahrmeijer<sup>3</sup>, C.W.G.M. Löwik<sup>1</sup>, J. Dijkstra<sup>2</sup>

\* Both authors contributed equally to this work and share first-authorship.

Leiden University Medical Center, Leiden, The Netherlands, departments of Radiology, Molecular imaging<sup>1</sup> and image processing<sup>2</sup> and Surgery<sup>3</sup>

Erasmus Medical Center, Rotterdam, The Netherlands, Department of Otorhinolaryngology & Head and Neck Surgery<sup>4</sup>

Utrecht University, Utrecht, The Netherlands, Department of Biology<sup>5</sup>

University Medical Center Utrecht, Utrecht, The Netherlands, Department Pathology<sup>6</sup>

**Corresponding author:** P.B.A.A. van Driel, Leiden University Medical Center, P.O. Box 9600, 2300 RC Leiden, The Netherlands, tel: +31715263075

## Characterization and Evaluation of the Artemis Camera for fluorescence-guided Cancer

### Surgery – supplementary figure

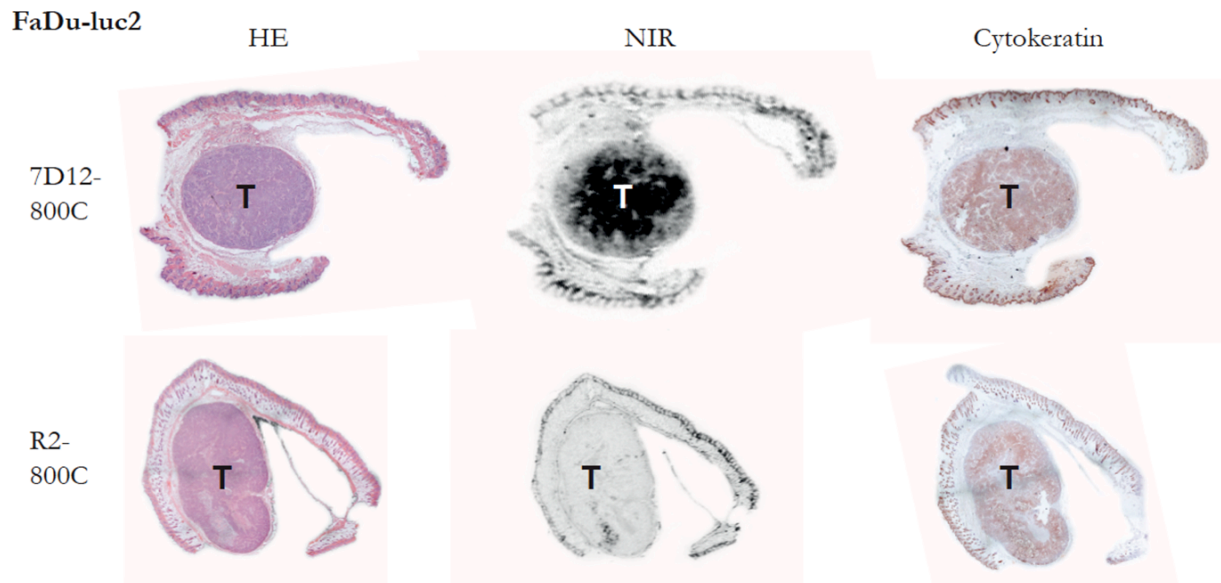

**Supplementary figure I. Histology of subcutaneous human hypopharyngeal squamous cell carcinomas:** fluorescence of 7D12-800CW is observed in the tumor, implicating tumor specificity of 7D12-800CW. Shown are hematoxylin and eosin (HE) stainings, near-infrared (NIR) fluorescence images of 7D12-800CW and R2-800CW and anti-human wide spectrum cytokeratin stainings indicating the presence of tumor cells.
